# Supplementary material for: Self-assembly of metallomacrocycles with dipyrazole ligands and anion sensing of [Pd4Fe2] macrocycle with ferrocene-based dipyrazole ligand
Source: Royal Society of Chemistry journal article supplement (doi:10.1039/c2dt32576d), 2012-11-22
Supplement: c2dt32576d.pdf [file c2dt32576d.pdf]

## Supporting Information

# Self-Assembly of Metallomacrocycles with Dipyrazole Ligands and Anion Sensing of [Pd<sub>4</sub>Fe<sub>2</sub>] Macrocycle with Ferrocene-Based Dipyrazole ligand

*Liao-Yuan Yao,<sup>a</sup> Zheng-Su Yu,<sup>b</sup> Lin Qin,<sup>a</sup> Yi-Zhi Li,<sup>b</sup> Yu Qin,<sup>b\*</sup> and Shu-Yan Yu<sup>a\*</sup>*

<sup>a</sup>Laboratory for Self-Assembly Chemistry, Department of Chemistry, Renmin University of China, Beijing 100872, People's Republic of China; <sup>b</sup>Department of Chemistry, State Key Laboratory of Coordination Chemistry, Coordination Chemistry Institute and State Key Laboratory of Analytical Chemistry for Life Science, Nanjing University, Nanjing 210093, People's Republic of China.

\* To whom correspondence should be addressed. E-mail: yusy@ruc.edu.cn; qinyu75@nju.edu.cn.

### Contents:

|             |                                                                                                                                             |
|-------------|---------------------------------------------------------------------------------------------------------------------------------------------|
| Fig. S1-S2  | <sup>1</sup> H NMR spectra and ESI mass spectra of <b>2</b> ·4NO <sub>3</sub> .                                                             |
| Fig. S3-S4  | Packing diagrams and crystal picture of <b>1</b> ·4NO <sub>3</sub> .                                                                        |
| Fig. S5-S10 | <sup>1</sup> H NMR spectra and ESI mass spectra of <b>3</b> ·4NO <sub>3</sub> , <b>5</b> ·4NO <sub>3</sub> and <b>6</b> ·4NO <sub>3</sub> . |
| Fig. S11    | Packing diagrams of <b>4</b> ·4NO <sub>3</sub> .                                                                                            |
| Fig. S12    | Job's plot analysis.                                                                                                                        |
| Table S1-S4 | Tables of selected bond lengths and angles for the complexes <b>1</b> ·4NO <sub>3</sub> and <b>4</b> ·4NO <sub>3</sub> .                    |

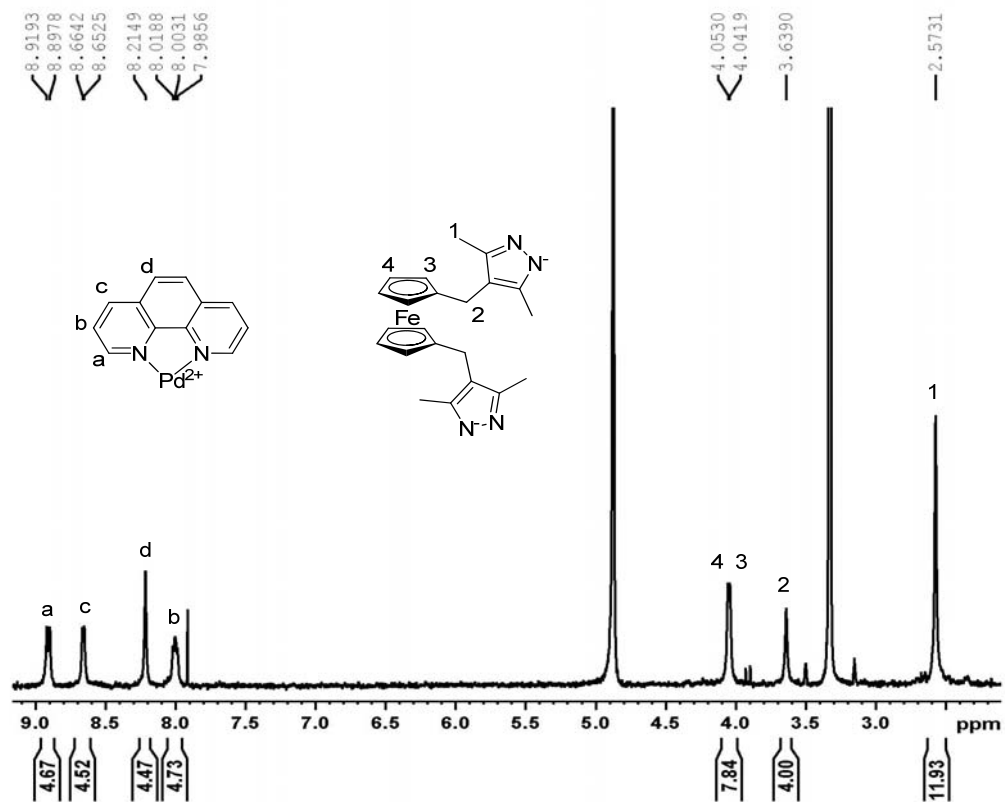

Fig. S1  $^1\text{H}$  NMR spectrum of  $2 \cdot 4\text{NO}_3$  in  $\text{D}_2\text{O}$

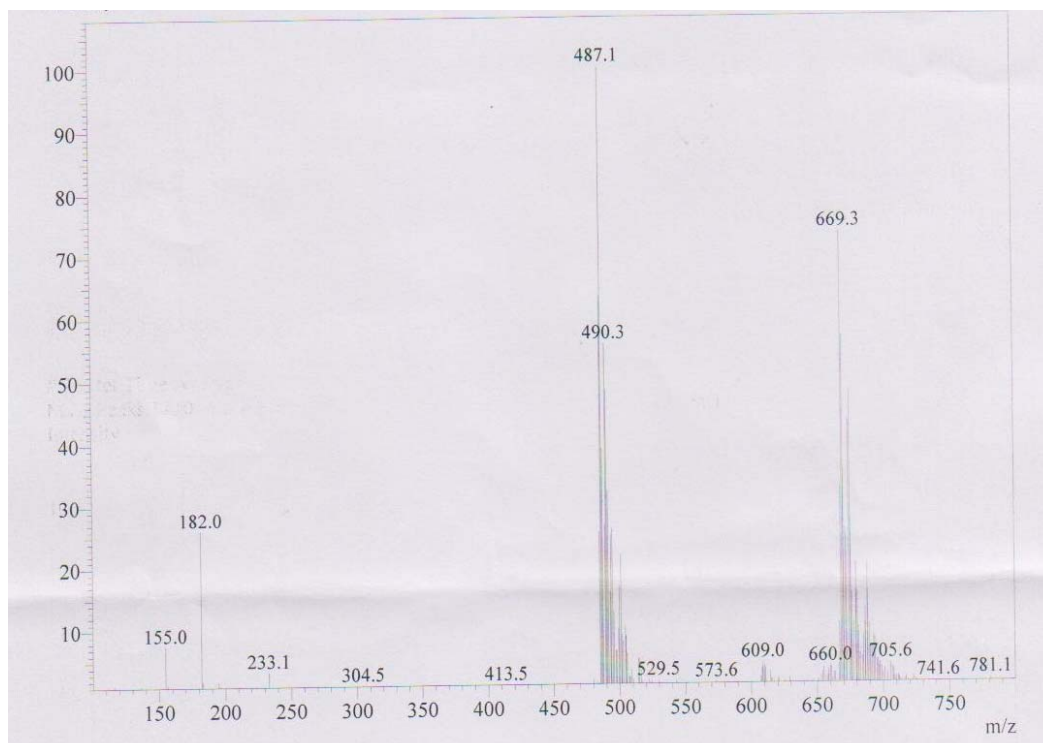

Fig. S2 ESI mass spectrum of  $2 \cdot 4\text{NO}_3$  in methanol.

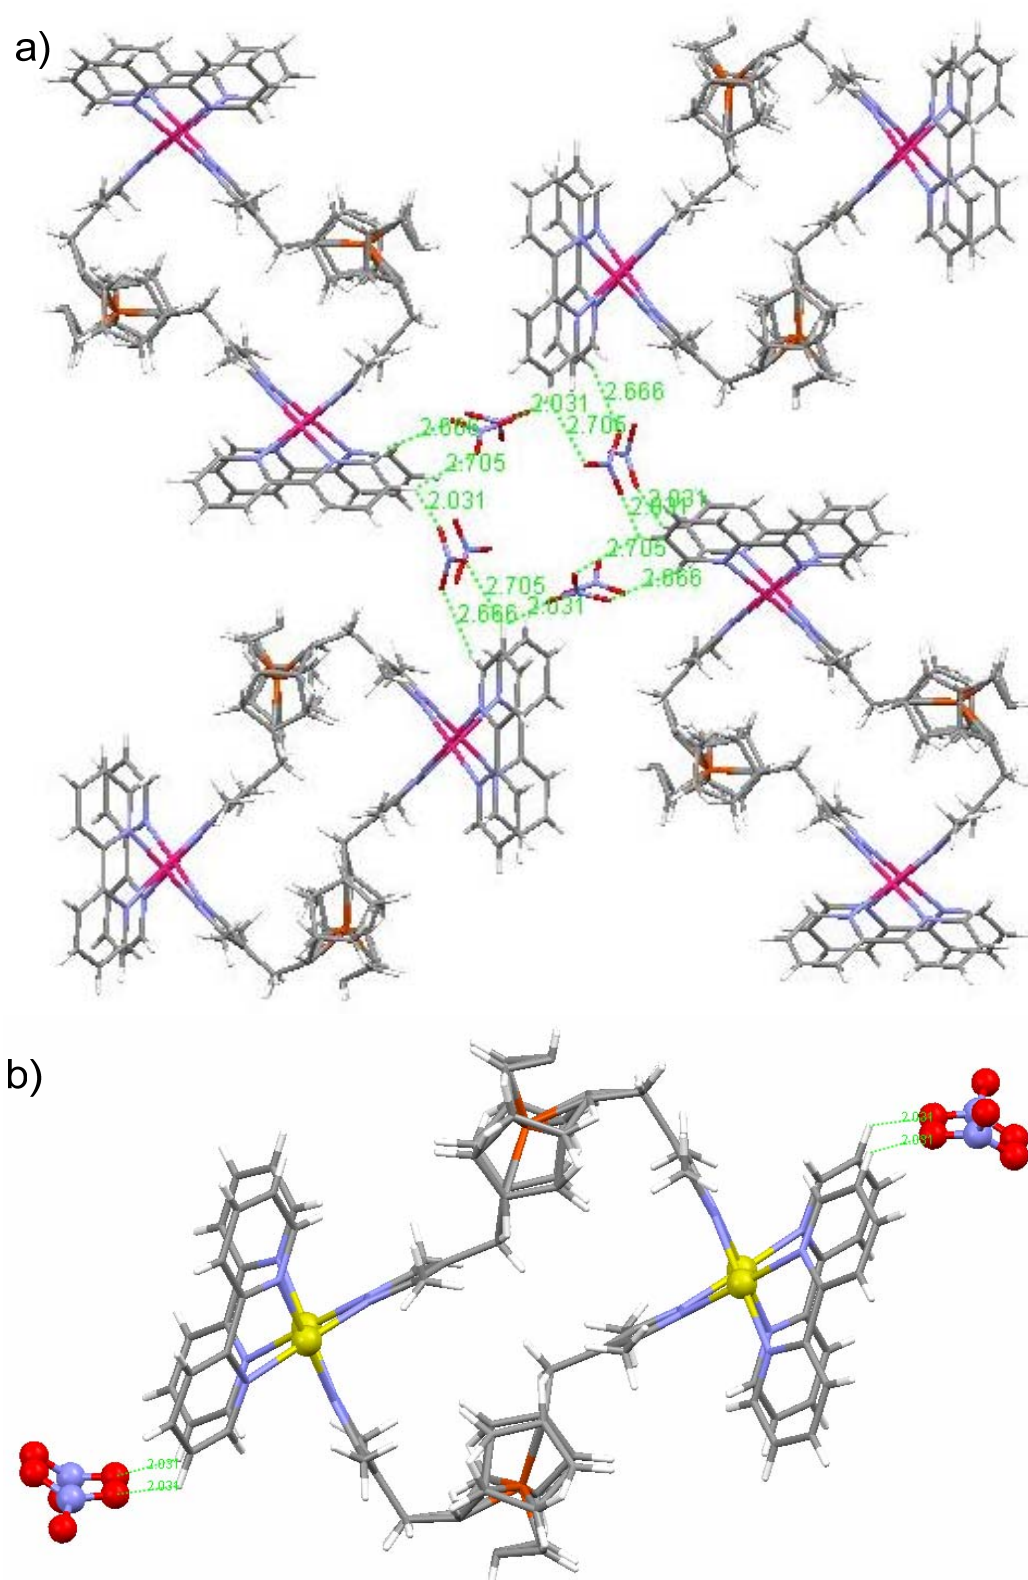

**Fig. S3** a) The crystal packing diagram of complex **1**·4NO<sub>3</sub>. b) Four NO<sub>3</sub><sup>-</sup> trapped on **1** through C-H...O hydrogen bonds.

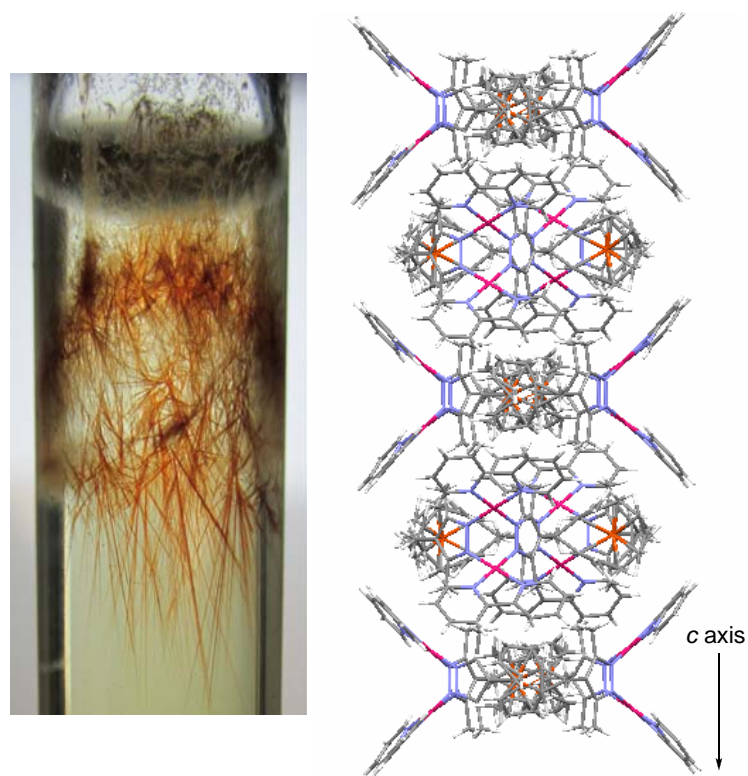

**Fig. S4** Left: the needle crystals of  $1 \cdot 4\text{NO}_3$ . Right: the molecules of  $1 \cdot 4\text{NO}_3$  packing along c axis.

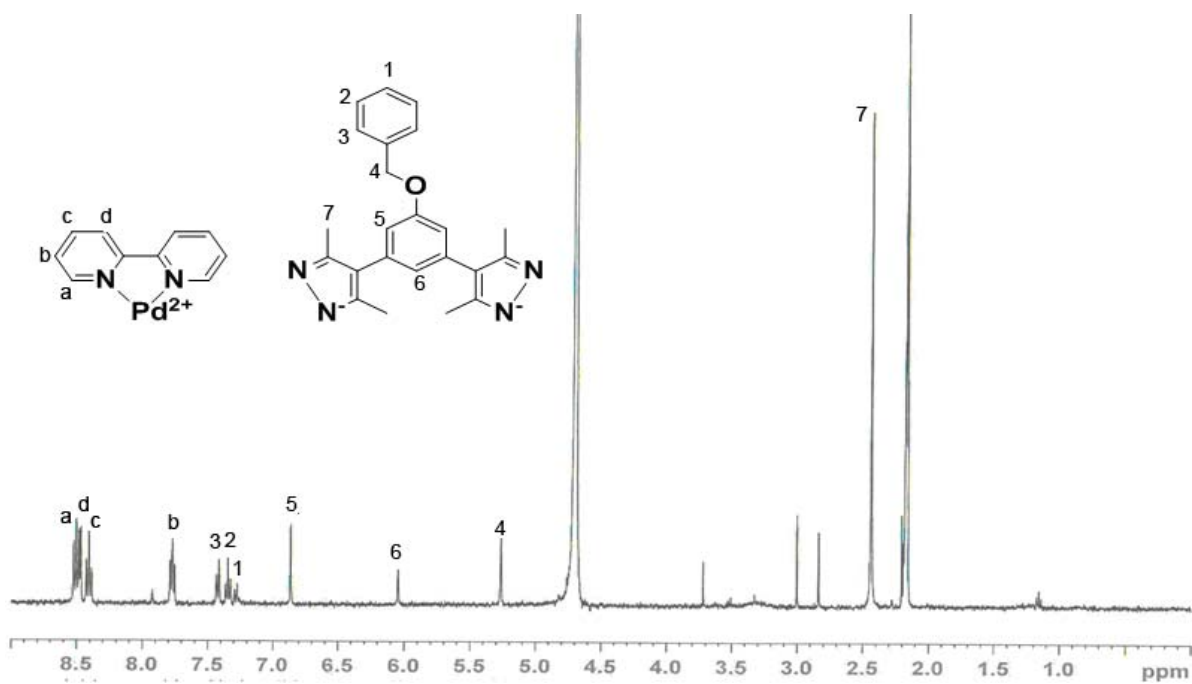

**Fig. S5**  $^1\text{H}$  NMR spectrum of  $3 \cdot 4\text{NO}_3$  in  $\text{D}_2\text{O}$

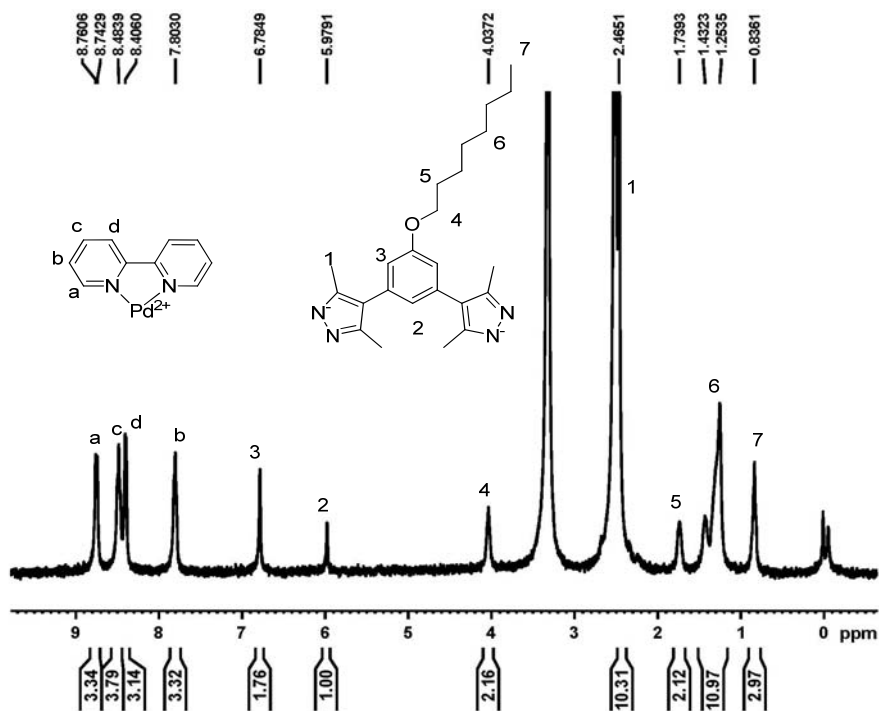

**Fig. S6**  $^1\text{H}$  NMR spectrum of **5**· $4\text{NO}_3$  in  $\text{DMSO-}d_6$

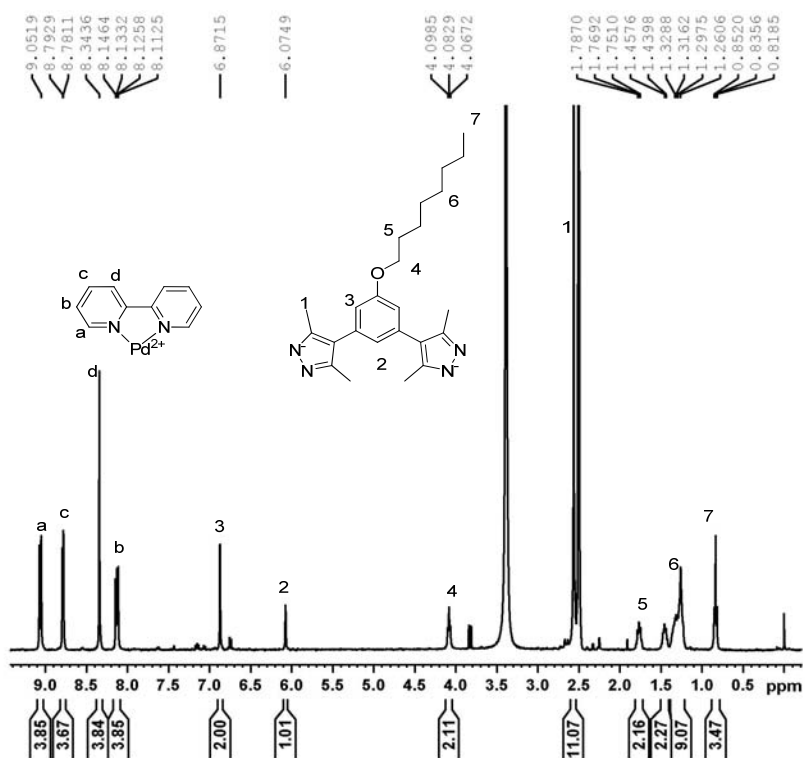

**Fig. S7**  $^1\text{H}$  NMR spectrum of **6**· $4\text{NO}_3$  in  $\text{DMSO-}d_6$

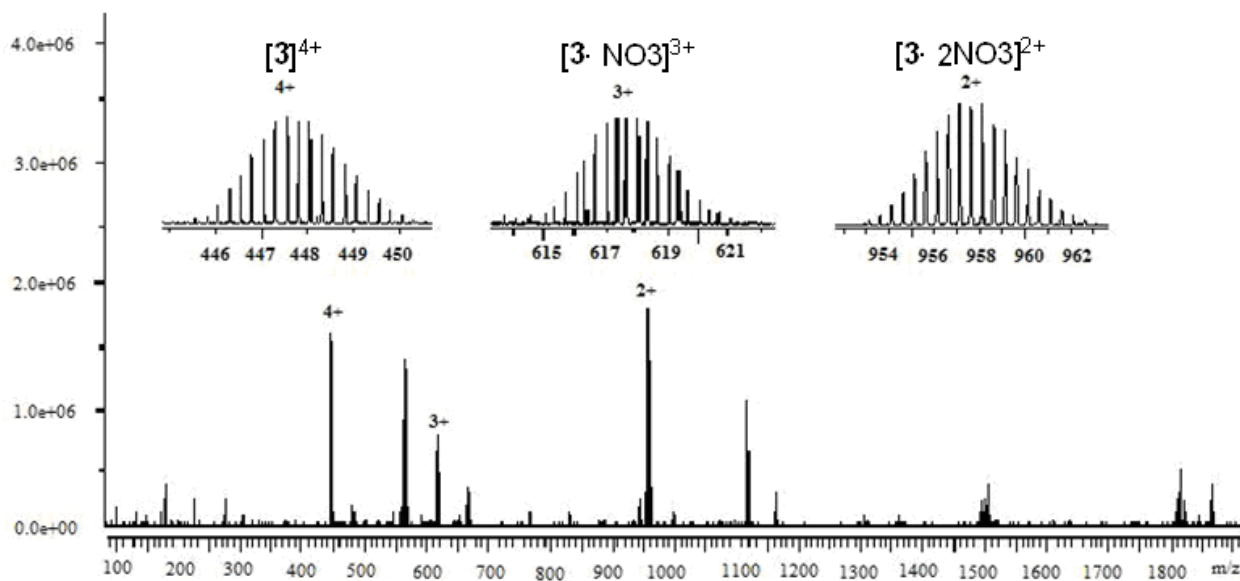

**Fig. S8** ESI mass spectrum of  $3 \cdot 4NO_3$  in methanol. The inset shows the isotopic distribution of the species  $[3]^{4+}$ ,  $[3 \cdot NO_3]^{3+}$ , and  $[3 \cdot 2NO_3]^{2+}$ .

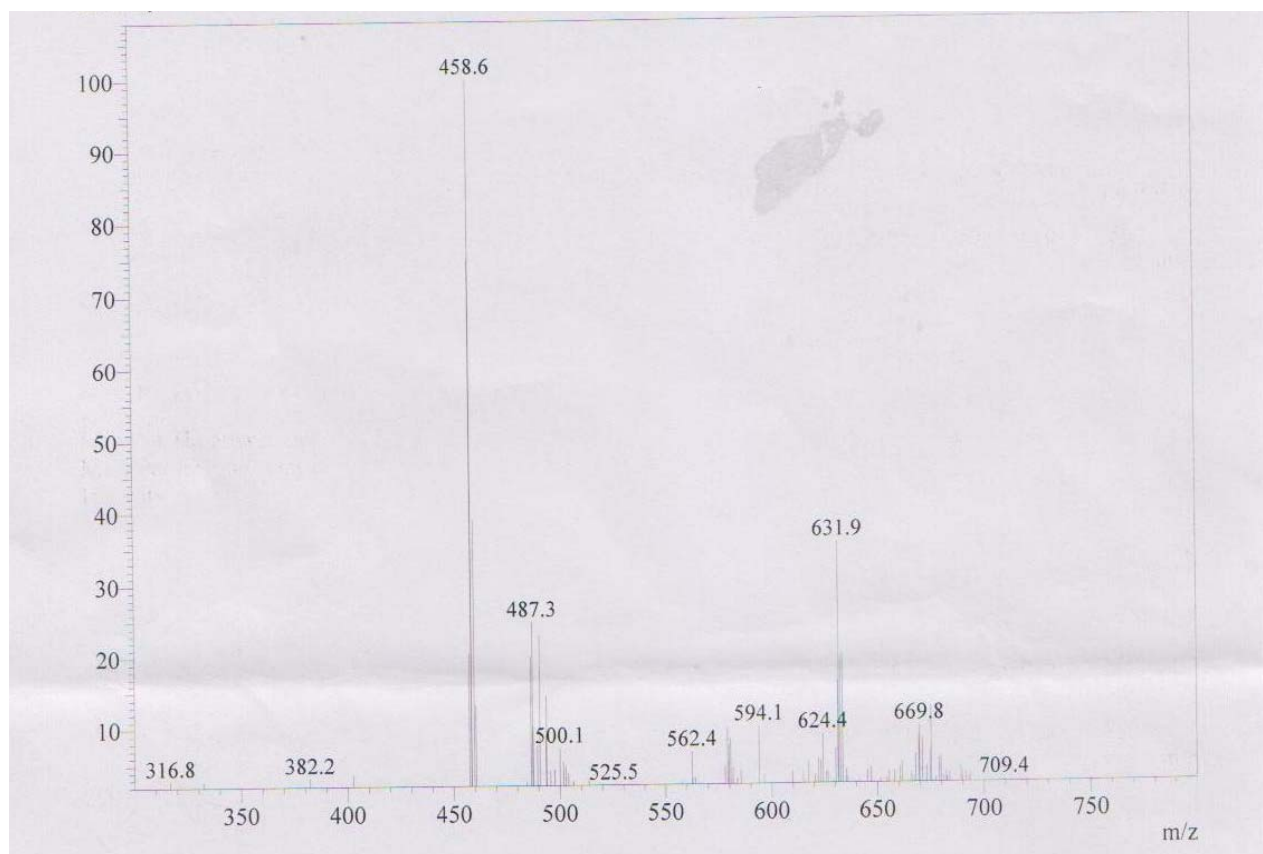

**Fig. S9** ESI mass spectrum of  $5 \cdot 4NO_3$  in methanol.

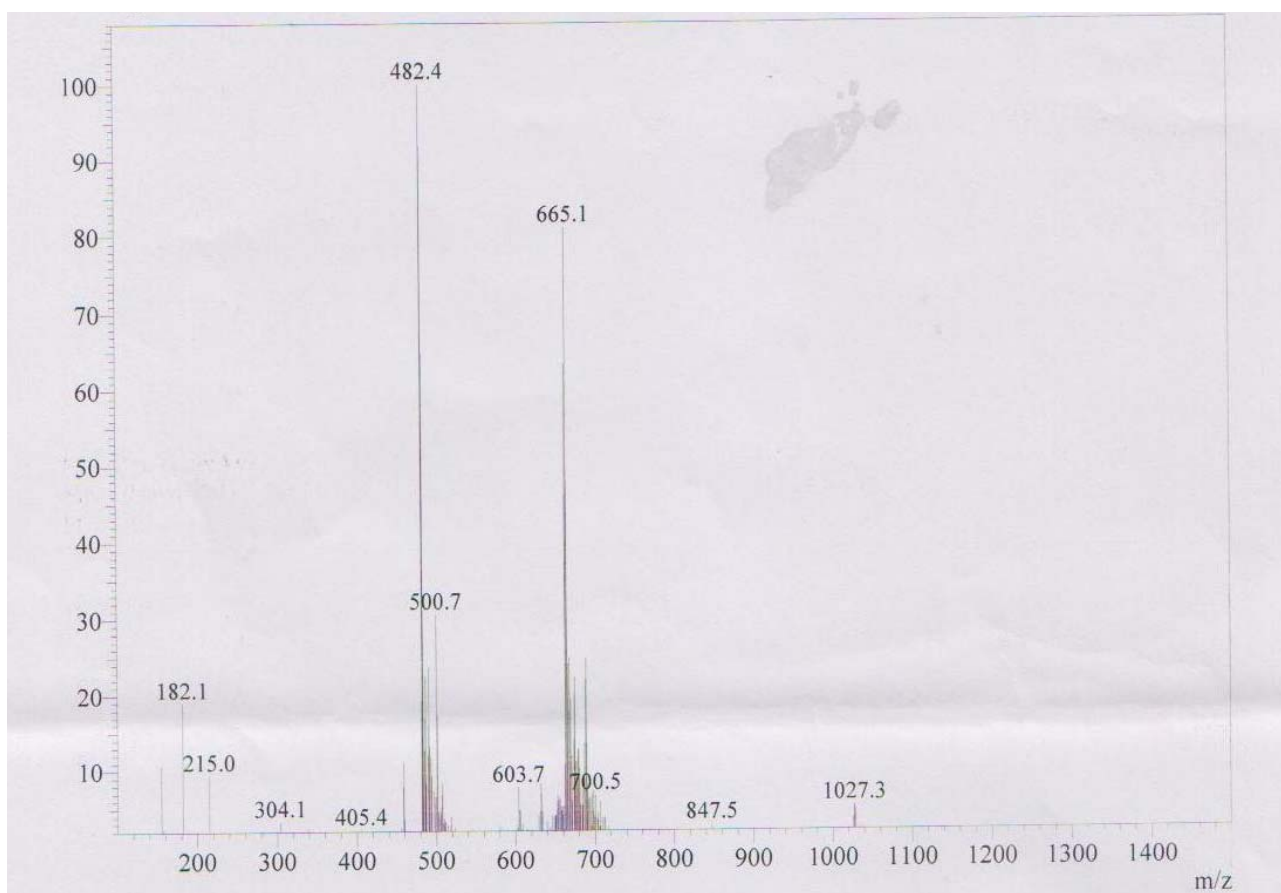

**Fig. S10** ESI mass spectrum of  $6 \cdot 4\text{NO}_3$  in methanol.

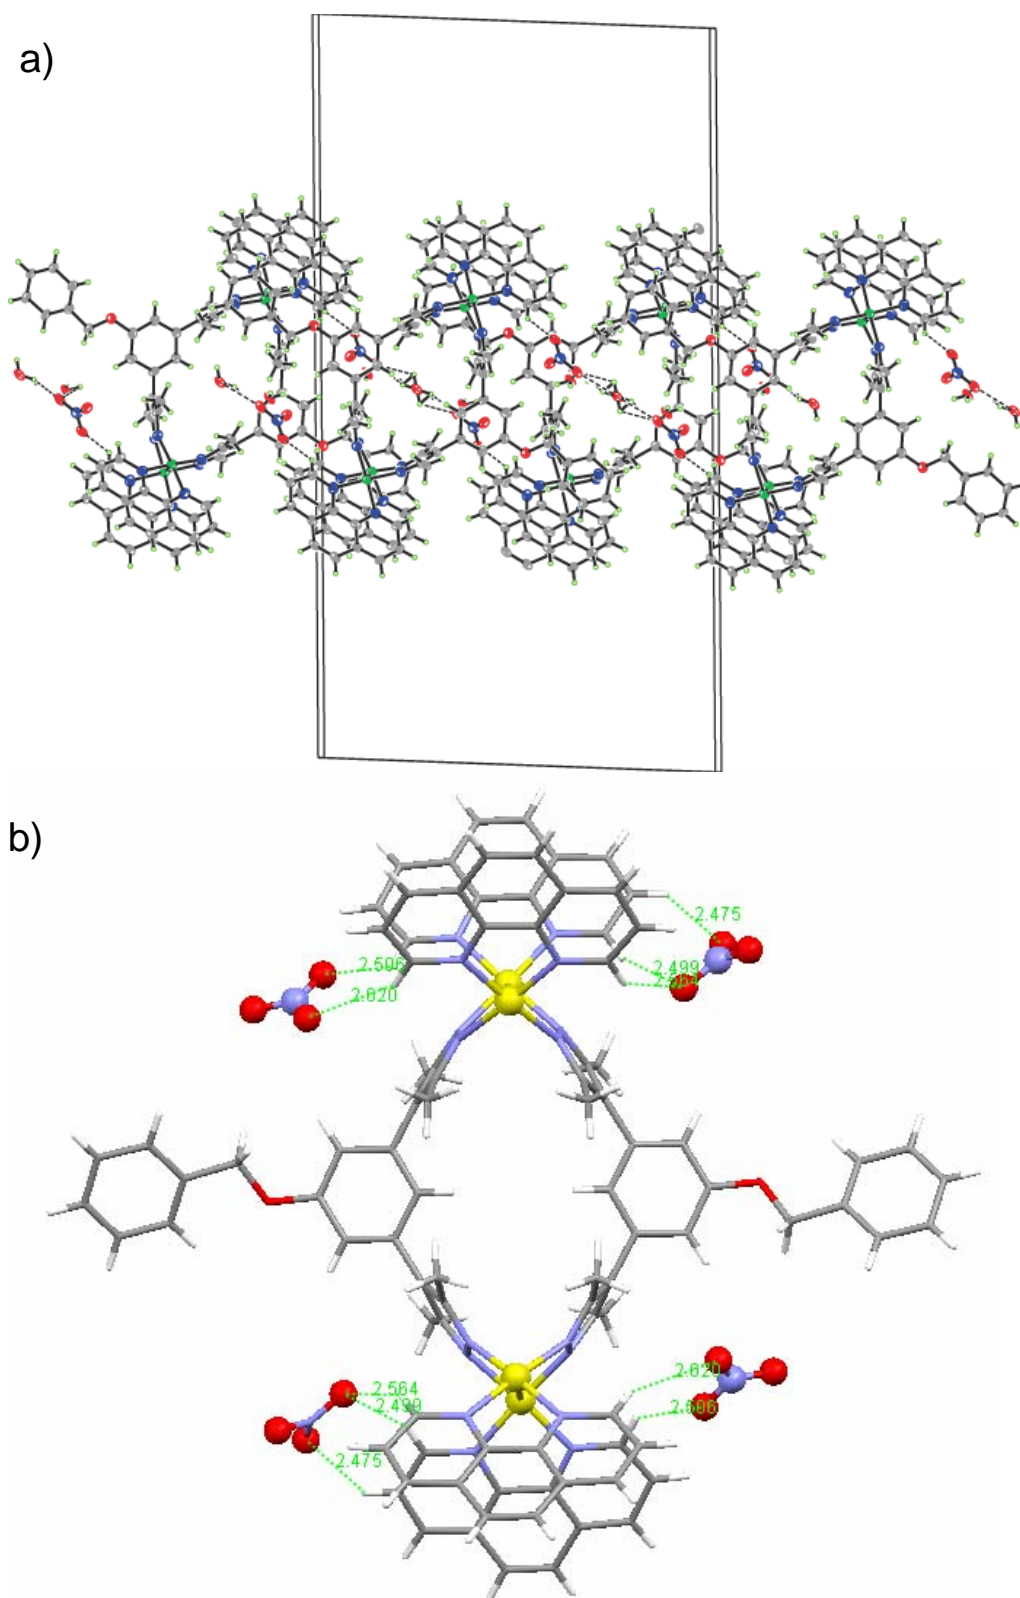

**Fig. S11** a) The crystal packing diagram of complex  $4 \cdot 4\text{NO}_3$ . b) Four  $\text{NO}_3^-$  trapped on **4** through C-H $\cdots$ O hydrogen bonds.



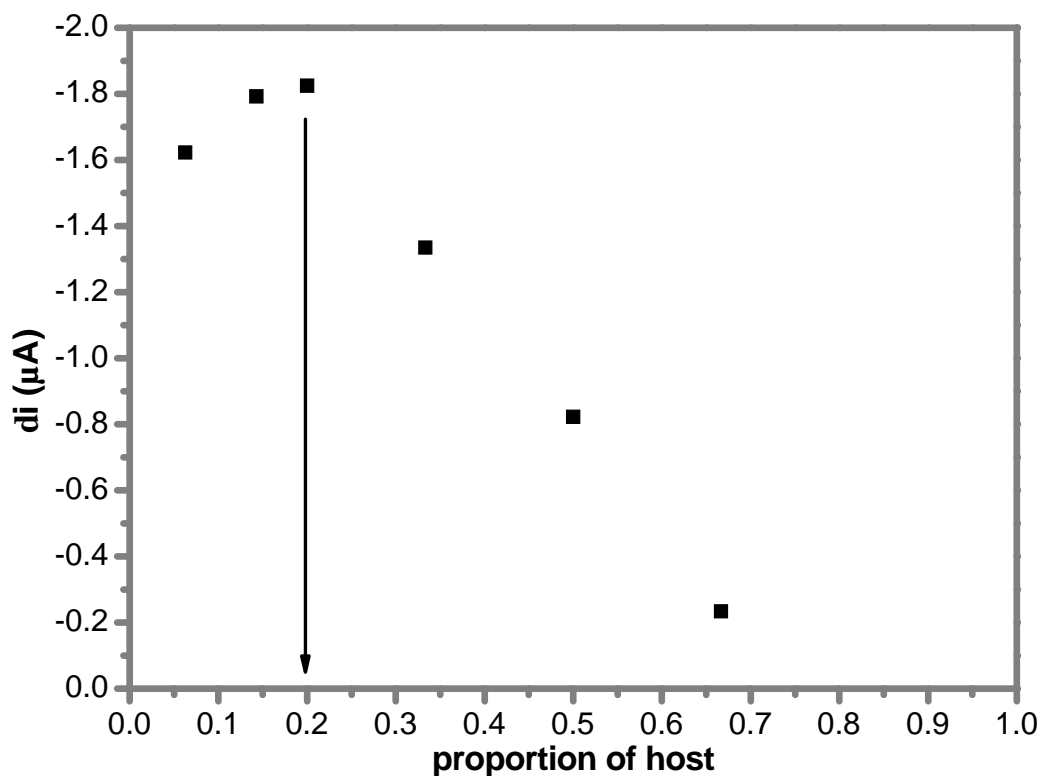

Fig. S12 Job's plot analysis.

Table S1 Selected Bond Lengths ( $\text{\AA}$ ) and Angles ( $^\circ$ ) for  $1 \cdot 4\text{NO}_3$

|           |            |           |            |
|-----------|------------|-----------|------------|
| Pd1-N1    | 2.037(3)   | Pd1-N2    | 2.072(3)   |
| Pd1-N3    | 2.045(3)   | Pd1-N4    | 2.016(3)   |
| Fe1-C15   | 2.088(6)   | Fe1-C16   | 2.023(8)   |
| Fe1-C17   | 1.955(3)   | Fe1-C18   | 1.928(3)   |
| Fe1-C19   | 2.097(7)   | Fe1-C20   | 1.877(6)   |
| Fe1-C21   | 1.868(6)   | Fe1-C22   | 1.937(8)   |
|           |            |           |            |
| N1-Pd1-N2 | 84.13(11)  | N1-Pd1-N3 | 96.57(11)  |
| N1-Pd1-N4 | 179.93(13) | N2-Pd1-N3 | 178.31(11) |
| N2-Pd1-N4 | 95.80(11)  | N3-Pd1-N4 | 83.51(11)  |

**Table S2** Hydrogen bond lengths (Å) and angles (°) for the complex **1**·4NO<sub>3</sub>

| D–H···A    | D(D–H) | D(H···A) | D(D···A) | ∠(DHA) |
|------------|--------|----------|----------|--------|
| C9–H9···O2 | 0.9300 | 2.0300   | 2.595(4) | 118.00 |

Symmetry Code: y,1-x,z

**Table S3** Selected Bond Lengths (Å) and Angles (°) for **4**·4NO<sub>3</sub>

|           |           |           |           |
|-----------|-----------|-----------|-----------|
| Pd1–N1    | 1.999(4)  | Pd1–N2    | 2.022(4)  |
| Pd1–N6    | 2.005(4)  | Pd1–N8    | 2.005(4)  |
| Pd2–N3    | 2.004(4)  | Pd2–N4    | 1.984(5)  |
| Pd2–N5    | 1.995(4)  | Pd2–N7    | 1.993(4)  |
| N5–N6     | 1.388(5)  | N7–N8     | 1.347(5)  |
| N1–Pd1–N2 | 81.91(18) | N6–Pd1–N8 | 86.33(16) |
| N3–Pd2–N4 | 80.86(17) | N5–Pd2–N7 | 84.96(17) |
| Pd1–N6–N5 | 117.3(3)  | Pd1–N8–N7 | 119.8(3)  |
| Pd2–N6–N5 | 121.2(3)  | Pd2–N7–N8 | 116.8(3)  |

**Table S4** Hydrogen bond lengths (Å) and angles (°) for the complex **4**·4NO<sub>3</sub>

| D–H···A                   | D(D–H) | D(H···A) | D(D···A) | ∠(DHA) |
|---------------------------|--------|----------|----------|--------|
| O5W–H5X···O6 <sup>y</sup> | 0.8500 | 1.9300   | 2.592(4) | 134.00 |
| O5W–H5Y···O6 <sup>u</sup> | 0.8500 | 2.2200   | 2.592(4) | 106.00 |
| C1–H1···O3 <sup>d</sup>   | 0.9300 | 2.5000   | 3.361(7) | 154.00 |
| C2–H2···O4 <sup>d</sup>   | 0.9300 | 2.4700   | 3.148(6) | 129.00 |
| C3–H3···O2 <sup>c</sup>   | 0.9300 | 2.3900   | 3.201(6) | 145.00 |

---

|                            |        |        |          |        |
|----------------------------|--------|--------|----------|--------|
| C10–H10···O7 <sup>i</sup>  | 0.9300 | 2.5100 | 3.249(6) | 137.00 |
| C13–H13···O3 <sup>d</sup>  | 0.9300 | 2.5600 | 3.347(7) | 142.00 |
| C15–H15···O4 <sup>j</sup>  | 0.9300 | 2.3400 | 3.169(5) | 149.00 |
| C20–H20···O3 <sup>m</sup>  | 0.9300 | 2.4700 | 3.351(6) | 158.00 |
| C25–H25B···O5 <sup>o</sup> | 0.9600 | 2.5800 | 3.185(6) | 121.00 |
| C43–H43···O1               | 0.9300 | 2.3800 | 2.719(6) | 101.00 |

---

Symmetry Code: <sup>y</sup>-1+x,1-y,-1/2+z; <sup>u</sup>1-x,1-y,1-z; <sup>d</sup>x,1-y,-1/2+z; <sup>e</sup>3/2-x,3/2-y,1-z; <sup>l</sup>x,y,-1+z;

<sup>j</sup>3/2-x,1/2-y,1-z; <sup>m</sup>x,-1+y,-1+z; <sup>o</sup>2-x,-y,1-z
